# Supplementary material for: Effect of domestication on the genetic diversity and structure of Saccharina japonica populations in China
Source: PubMed Central journal article supplement (PMC5296902; doi:10.1038/srep42158), 2017-02-08
Supplement: srep42158-s1.pdf [file srep42158-s1.pdf]

## Effect of domestication on the genetic diversity and structure of *Saccharina japonica* populations in China

Jie Zhang<sup>1,2,3</sup>, Xiuliang Wang<sup>1,2</sup>, Jianting Yao<sup>1,2,\*</sup>, Qiuying Li<sup>1,2,3</sup>, Fuli Liu<sup>4</sup>, Norishige Yotsukura<sup>5</sup>, Tatiana N Krupnova<sup>6</sup>, Delin Duan<sup>1,2,\*</sup>

Figure S1. Brief domestication history of *Saccharina japonica* in China<sup>1-7</sup>.

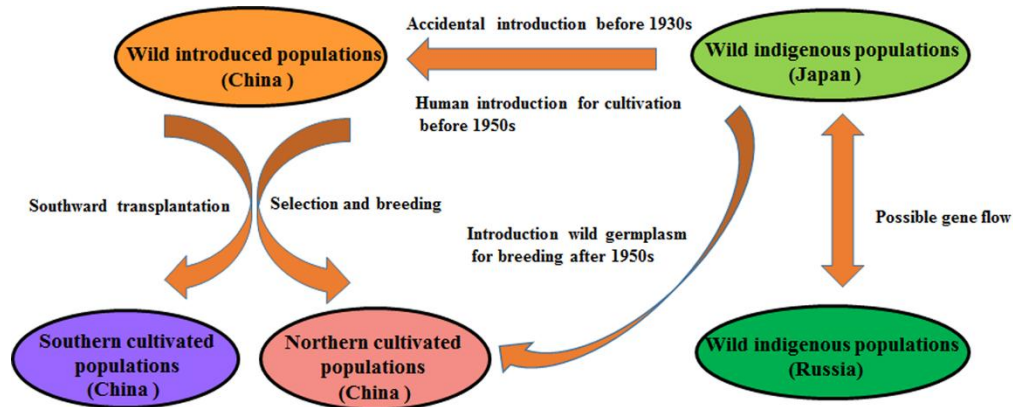

Figure S2. Determination of the optimal K values for *Saccharina japonica* populations implemented in STRUCTURE HARVESTER (<http://taylor0.biology.ucla.edu/structureHarvester/>) using the  $\Delta K$  method and  $\text{LnP}(D)$ . (a). Mean log probability of data  $\text{LnP}(D)$  over 20 replicates for each K values (error bars represent standard deviation); (b).  $\Delta K$  over 20 replicates for each K values .

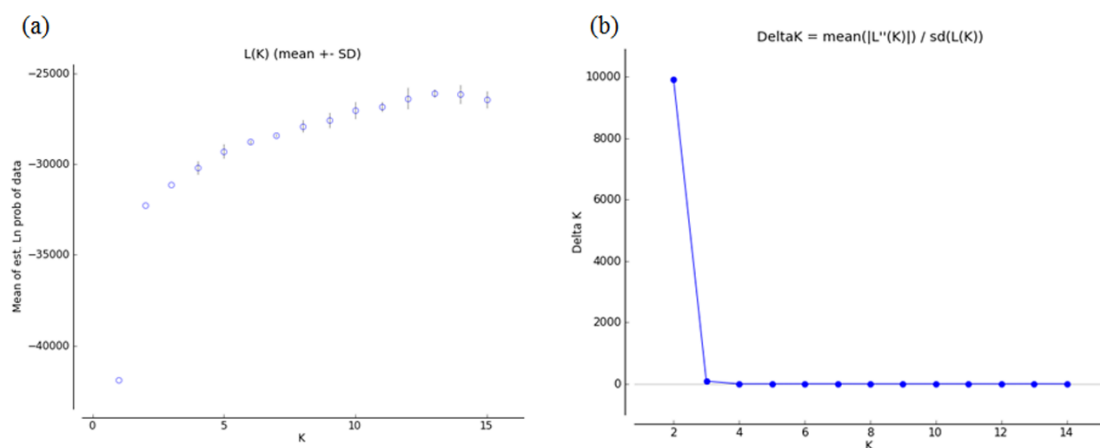

Table S1 Background of *Saccharina japonica* populations used in this study.

| Code                                             | Coordinate                | Genetic background                                                                                                        |
|--------------------------------------------------|---------------------------|---------------------------------------------------------------------------------------------------------------------------|
| <b>Northern cultivated populations (NC)</b>      |                           |                                                                                                                           |
| ZK1*                                             | N 37°13'55" E 122°35'54"  | Zhongke No.1: descendants of <i>S. japonica</i> intraspecific hybridization <sup>1</sup>                                  |
| ZK2*                                             | N 37°13'39" E 122°36'01"  | Zhongke No.2: artificial selected from <i>S. japonica</i> aquaculture farm <sup>1</sup>                                   |
| AL*                                              | N 37°13'25" E 122°36'53"  | Ailunwan (Benniu): inbreeding descendants of <i>S. japonica</i> landrace <sup>1</sup>                                     |
| 901*                                             | N 37°13'13" E 122°36'04"  | 90-1: hybrid of <i>S. longissima</i> (maternal parent) and <i>S. japonica</i> (paternal parent) <sup>2,3</sup>            |
| DF2*                                             | N 37°13'11" E 122°36'12"  | Dongfang No.2: F1 hybrids of <i>S. longissima</i> (paternal parent) and <i>S. japonica</i> (maternal parent) <sup>4</sup> |
| DF3                                              | N 37°13'03" E 122°36'40"  | Dongfang No.3: F1 hybrids of <i>S. longissima</i> (maternal parent) and <i>S. japonica</i> (paternal parent) <sup>5</sup> |
| RF                                               | N 37°13'50" E 122°35'20"  | Rongfu: hybrid of <i>S. japonica</i> and Yuanza NO.10 ( <i>S. japonica</i> × <i>S. latissima</i> ) <sup>6</sup>           |
| TJ                                               | N 38°09'18" E 120°45'18"  | Tuoji: artificial selected <i>S. japonica</i> from northern cultivars                                                     |
| LJ                                               | N 37°09'39" E 122°30'47"  | Lijiang: artificial selected <i>S. japonica</i> from northern cultivars                                                   |
| NJ                                               | N 36°55'20" E 122°31'18"  | Ningjin: artificial selected <i>S. japonica</i> from northern cultivars                                                   |
| PL                                               | N 37°49'53" E 120°46'16"  | Penglai: artificial selected <i>S. japonica</i> from northern cultivars                                                   |
| YZ                                               | N 36°45'47" E 121°27'22"  | Yanza: hybrid between <i>S. japonica</i> and <i>S. longissima</i> <sup>7</sup>                                            |
| <b>Southern cultivated populations (SC)</b>      |                           |                                                                                                                           |
| HG                                               | N 38°48'36" E 121°23'24"  | Huangguan No.1: descendants of <i>S. japonica</i> (southern cultivars) intraspecific hybridization <sup>8</sup>           |
| LZ*                                              | N 26°19'25" E 119°49'02"  | Lianza: artificial selected from descendants of transplanting <i>S. japonica</i> from northern China <sup>1</sup>         |
| GW*                                              | N 26°19'27" E 119°49'17"  | Guanwu: artificial selected from descendants of transplanting <i>S. japonica</i> from northern China <sup>1</sup>         |
| PT                                               | N 25°11'06" E 119°14'42"  | Putian: artificial selected from descendants of southern cultivars                                                        |
| XP                                               | N 26°41'44" E 119°55'34"  | Xiapu: artificial selected from descendants of southern cultivars                                                         |
| <b>Wild invasive populations in China (WI)</b>   |                           |                                                                                                                           |
| XS*                                              | N 37°09'54" E 122°35'24"  | <i>S. japonica</i> population grow in rocks of intertidal zone and have no clear origin information                       |
| YM*                                              | N 37°29'24" E 122°34'00"  | <i>S. japonica</i> population grow in rocks of intertidal zone and have no clear origin information                       |
| ZD*                                              | N 39°05'00" E 122°47'00"  | <i>S. japonica</i> population grow in rocks of intertidal zone and have no clear origin information                       |
| <b>Wild ingenious populations in Russia (WR)</b> |                           |                                                                                                                           |
| EP*                                              | N 43°06'54" E 131°52'12"  | Wild <i>S. japonica</i> in Eastern Primorsky                                                                              |
| SH*                                              | N 46°25'03" E 141°51'0.7" | Wild <i>S. japonica</i> in Shebunino, Sakhalin                                                                            |
| AW*                                              | N 46°06'00" E 143°18'00"  | Wild <i>S. japonica</i> in western Aniva Bay, Sakhalin                                                                    |
| <b>Wild ingenious populations in Japan (WJ)</b>  |                           |                                                                                                                           |
| WA*                                              | N 45°27'01" E 141°38'42"  | Wild <i>S. japonica</i> in Wakkanai, Hokkaido                                                                             |
| SP*                                              | N 43°58'41" E 144°52'32"  | Wild <i>S. japonica</i> in Shiretoko Peninsula, Hokkaido                                                                  |
| KA*                                              | N 43°20'17" E 140°23'27"  | Wild <i>S. japonica</i> in Kamui cape, Hokkaido                                                                           |
| HA*                                              | N 41°46'00" E 140°41'25"  | Wild <i>S. japonica</i> in Hakodate, Hokkaido                                                                             |
| SA                                               | N 41°25'50" E 141°27'37"  | Wild <i>S. japonica</i> in Shiriya, Aomori pref, Honshu                                                                   |

Six cultivars (bold) have been examined and approved by the Chinese Approving Committee of Aquacultural Stock Seeds and Elite Varieties: “Huangguan No.1” (HG), “Rongfu” (RF), “Ailunwan” (AL), “90-1” (901), “Dongfang No.2” (DF2) and “Dongfang No.3” (DF3). The parentage information of other 11 cultivars was unclear, because most of these cultivars were hybrid and selected from different cultivated populations by local farmers and it is thus difficult to explore their genuine pedigree. **Seven** cultivated populations (\*) had already been used in previous study<sup>1</sup> and ten wild invasive/indigenous populations (\*) had already been used in previous study<sup>9</sup>.

#### Reference:

1. Liu, F. L. *et al.* Genetic diversity and structure within and between wild and cultivated *Saccharina japonica* (Laminariales, Phaeophyta) revealed by SSR markers. *Aquaculture* **358-359**, 139-145, (2012).
2. Xia, P. *et al.* Genetic study of Kelp "901" strain. *Chin. J. Oceanol. Limn.* **23**, 152-157 (2005).
3. Zhang, Q. S. *et al.* Breeding of an elite *Laminaria* variety 90-1 through inter-specific gametophyte crossing. *J. Appl. Phycol.* **19**, 303-311 (2007).
4. Li, X. J. *et al.* Trait evaluation and trial cultivation of Dongfang No. 2, the hybrid of a male gametophyte clone of *Laminaria longissima* (Laminariales, Phaeophyta) and a female one of *L. japonica*. *J. Appl. Phycol.* **19**, 139-151, (2007).
5. Li, X. J. *et al.* Breeding and trial cultivation of Dongfang No. 3, a hybrid of *Laminaria* gametophyte clones with a more than intraspecific but less than interspecific relationship. *Aquaculture* **280**, 76-80 (2008).
6. Zhang, J. *et al.* Study on high-temperature-resistant and high-yield *Laminaria* variety “Rongfu”. *J. Appl. Phycol.* **23**, 165-171 (2011).
7. Shan, T. F., Pang, S. J., Zhang, Y. R., Yakovleva, I. M. & Skriptsova, A. V. An AFLP-based survey of genetic diversity and relationships of major farmed cultivars and geographically isolated wild populations of *Saccharina japonica* (Phaeophyta) along the northwest coasts of the Pacific. *J. Appl. Phycol.* **23**, 35-45 (2010).
8. Liu, F. L. *et al.* Breeding, economic traits evaluation, and commercial cultivation of a new *Saccharina* variety “Huangguan No. 1”. *Aquac. Int.* **22**, 1665-1675 (2014).
9. Zhang, J. *et al.* Phylogeographic data revealed shallow genetic structure in the kelp *Saccharina japonica* (Laminariales, Phaeophyta). *BMC Evol. Biol.* **15**, 237 (2015)

Table S2. Characteristic parameters of 23 SSR loci detected in *Saccharina japonica* populations

| SSR   | $P_A$ (%) | A  | PIC  | $H_E$       | $H_O$       | NULL        |
|-------|-----------|----|------|-------------|-------------|-------------|
| SJ3   | 99.6      | 14 | 0.59 | 0.42 (0.05) | 0.38 (0.04) | 0.00 (0.00) |
| SJ13  | 100       | 9  | 0.60 | 0.24 (0.05) | 0.36 (0.04) | 0.10 (0.02) |
| SJ80  | 99.6      | 20 | 0.63 | 0.44 (0.06) | 0.41 (0.05) | 0.01 (0.00) |
| SJ20  | 100       | 15 | 0.72 | 0.50 (0.04) | 0.49 (0.03) | 0.02 (0.01) |
| SJ66  | 99.9      | 11 | 0.55 | 0.37 (0.04) | 0.39 (0.04) | 0.03 (0.01) |
| SJ95  | 99.9      | 30 | 0.77 | 0.55 (0.04) | 0.56 (0.04) | 0.03 (0.01) |
| SJ133 | 100       | 10 | 0.35 | 0.31 (0.05) | 0.29 (0.04) | 0.02 (0.01) |
| SJ106 | 100       | 11 | 0.65 | 0.42 (0.04) | 0.41 (0.03) | 0.03 (0.01) |
| SJ132 | 99.7      | 36 | 0.83 | 0.72 (0.04) | 0.68 (0.04) | 0.02 (0.01) |
| SJ52  | 100       | 9  | 0.65 | 0.43 (0.05) | 0.41 (0.04) | 0.02 (0.01) |
| SJ31  | 100       | 9  | 0.22 | 0.18 (0.05) | 0.16 (0.04) | 0.01 (0.01) |
| SJ93  | 99.7      | 7  | 0.50 | 0.28 (0.05) | 0.28 (0.04) | 0.03 (0.01) |
| SJ86  | 100       | 14 | 0.56 | 0.44 (0.04) | 0.46 (0.03) | 0.03 (0.01) |
| SJ102 | 99.6      | 14 | 0.69 | 0.52 (0.05) | 0.50 (0.04) | 0.02 (0.01) |
| SJ99  | 100       | 22 | 0.52 | 0.45 (0.04) | 0.45 (0.03) | 0.04 (0.01) |
| SJ110 | 99.9      | 20 | 0.76 | 0.59 (0.05) | 0.56 (0.04) | 0.02 (0.01) |
| SJ101 | 100       | 12 | 0.56 | 0.37 (0.04) | 0.39 (0.04) | 0.03 (0.01) |
| SJ21  | 99.9      | 14 | 0.67 | 0.36 (0.05) | 0.43 (0.04) | 0.07 (0.02) |
| SJ113 | 99.5      | 16 | 0.65 | 0.42 (0.04) | 0.43 (0.04) | 0.04 (0.01) |
| SJ125 | 96.0      | 14 | 0.63 | 0.19 (0.03) | 0.39 (0.06) | 0.13 (0.02) |
| SJ24  | 99.9      | 19 | 0.73 | 0.62 (0.04) | 0.61 (0.03) | 0.02 (0.01) |
| SJ114 | 99.9      | 9  | 0.57 | 0.42 (0.04) | 0.40 (0.03) | 0.02 (0.01) |
| SJ136 | 100       | 50 | 0.78 | 0.36 (0.04) | 0.61 (0.04) | 0.16 (0.02) |

$P_A$ , percentage of successful amplification per locus; A, alleles number; PIC, polymorphic information content;  $H_E$ , mean expected heterozygosity across populations with standard error (SE);  $H_O$ , mean observed heterozygosity across populations with standard error (SE); NULL, mean frequency of null alleles across populations with standard error (SE).

Table S3 Genetic diversity ( $H_S$ ), inbreeding coefficient ( $F_{IS}$ ) and pairwise genetic differentiation  $F_{ST}$  values were calculated among populations within one group with FSTAT software. **These indices were compared between groups with the same software using a permutation procedure: the two-tailed  $P$  values were obtained after 1000 permutations.**

| Group                                      | Genetic diversity ( $H_S$ ) | $F_{IS}$ | $F_{ST}$ |
|--------------------------------------------|-----------------------------|----------|----------|
| Cultivated populations (NC and SC)         | 0.390                       | -0.078   | 0.199    |
| Wild indigenous populations (WR and WJ)    | 0.539                       | 0.054    | 0.247    |
| $P$ values                                 | 0.003                       | 0.06     | 0.591    |
| Northern cultivated populations (NC)       | 0.415                       | -0.097   | 0.192    |
| Southern cultivated populations (SC)       | 0.328                       | -0.019   | 0.145    |
| Wild introduced populations (WI)           | 0.386                       | 0.030    | 0.063    |
| Wild indigenous populations in Russia (WR) | 0.426                       | 0.053    | 0.305    |
| Wild indigenous populations in Japan (WJ)  | 0.607                       | 0.054    | 0.158    |
| $P$ values                                 | 0.010                       | 0.542    | 0.636    |

Table S4 Bottleneck tests of heterozygosity excess in 28 *Saccharina japonica* populations. Tests of heterozygosity excess were performed under three microsatellite mutation models (I.A.M: infinite allele model; S.M.M: stepwise mutation; T.P.M: two-phase mutation model), and all were assumed in mutation-drift equilibrium. *P* values for heterozygosity excess after FDR correction were in brackets, and significant *P* value (< 0.05) were indicated in bold. The allele frequency distribution was tested against a null hypothesis of exponential decline (L-shape; Shifted mode)

| Code                                              | Under the I.A.M        | Under the S.M.M        | Under the T.P.M        | Mode-shift            |
|---------------------------------------------------|------------------------|------------------------|------------------------|-----------------------|
| <b>Northern cultivated populations (NC)</b>       |                        |                        |                        |                       |
| ZK1                                               | 0.05890                | 0.96673                | 0.56748                | L-shaped distribution |
| ZK2                                               | 0.10455                | 0.92180                | 0.53914                | L-shaped distribution |
| AL                                                | <b>0.00357 (0.014)</b> | 0.20902                | 0.01291                | L-shaped distribution |
| 901                                               | 0.06010                | 0.69439                | 0.32207                | L-shaped distribution |
| DF2                                               | <b>0.00004 (0.001)</b> | <b>0.00004 (0.001)</b> | <b>0.00004 (0.001)</b> | <b>Shifted mode</b>   |
| DF3                                               | <b>0.00005 (0.001)</b> | 0.24754                | 0.00602                | L-shaped distribution |
| RF                                                | 0.28992                | 0.93513                | 0.72456                | L-shaped distribution |
| TJ                                                | 0.18461                | 0.85814                | 0.56748                | L-shaped distribution |
| LJ                                                | <b>0.00473 (0.017)</b> | 0.42979                | 0.04776                | L-shaped distribution |
| NJ                                                | 0.07702                | 0.75246                | 0.38301                | L-shaped distribution |
| PL                                                | 0.27061                | 0.99987                | 0.96686                | L-shaped distribution |
| YZ                                                | <b>0.00142 (0.013)</b> | 0.39913                | 0.05669                | L-shaped distribution |
| <b>Southern cultivated populations (SC)</b>       |                        |                        |                        |                       |
| HG                                                | <b>0.00229 (0.013)</b> | 0.88734                | 0.23266                | L-shaped distribution |
| LZ                                                | 0.82673                | 0.99974                | 0.98482                | L-shaped distribution |
| GW                                                | 0.02533                | 0.21660                | 0.11560                | L-shaped distribution |
| PT                                                | <b>0.00903 (0.028)</b> | 0.17957                | 0.06027                | L-shaped distribution |
| XP                                                | <b>0.01077 (0.030)</b> | 0.06769                | 0.03186                | <b>Shifted mode</b>   |
| <b>Wild invasive populations (WI)</b>             |                        |                        |                        |                       |
| XS                                                | 0.15190                | 0.99088                | 0.71008                | L-shaped distribution |
| YM                                                | <b>0.00278 (0.013)</b> | 0.05444                | 0.01161                | L-shaped distribution |
| ZD                                                | <b>0.00167 (0.012)</b> | 0.17623                | 0.01617                | L-shaped distribution |
| <b>Wild indigenous populations in Russia (WR)</b> |                        |                        |                        |                       |
| EP                                                | 0.98839                | 0.99990                | 0.99999                | L-shaped distribution |
| SH                                                | 0.82377                | 0.99915                | 0.98553                | L-shaped distribution |
| AW                                                | 0.51839                | 0.99966                | 0.97156                | L-shaped distribution |
| <b>Wild indigenous populations in Japan (WJ)</b>  |                        |                        |                        |                       |
| WA                                                | 0.38301                | 0.98658                | 0.83764                | L-shaped distribution |
| SP                                                | 0.09073                | 0.99832                | 0.79144                | L-shaped distribution |
| KA                                                | 0.15620                | 0.99833                | 0.86233                | L-shaped distribution |
| HA                                                | 0.15620                | 0.99941                | 0.96990                | L-shaped distribution |
| SA                                                | 0.09782                | 0.99915                | 0.83397                | L-shaped distribution |

Table S5 Pairwise values of  $F_{ST}$  (below diagonal) and  $P$ -values (above) after FDR correction between 28 *Saccharina japonica* populations for 16 SSR loci. Bold indicated non-significant  $P$ -values ( $P > 0.05$ ).  $F_{ST}$  values between Chinese populations and wild indigenous populations are in shaded.

|     | ZK1          | ZK2          | AL           | 901          | DF2          | DF3          | RF           | TJ           | LJ           | NJ           | PL           | YZ           | HG           | LZ           | GW           | PT           | XP           | XS           | YM           | ZD           | EP    | SH    | AW    | WA    | SP    | KA    | HA    | SA  |
|-----|--------------|--------------|--------------|--------------|--------------|--------------|--------------|--------------|--------------|--------------|--------------|--------------|--------------|--------------|--------------|--------------|--------------|--------------|--------------|--------------|-------|-------|-------|-------|-------|-------|-------|-----|
| ZK1 |              | NS           | ***          | ***          | ***          | ***          | ***          | ***          | *            | *            | ***          | ***          | ***          | ***          | ***          | ***          | ***          | ***          | ***          | ***          | ***   | ***   | ***   | ***   | ***   | ***   | ***   | *** |
| ZK2 | <b>0.009</b> |              | ***          | ***          | ***          | ***          | ***          | ***          | ***          | *            | ***          | ***          | ***          | ***          | ***          | ***          | ***          | ***          | ***          | ***          | ***   | ***   | ***   | ***   | ***   | ***   | ***   | *** |
| AL  | 0.056        | 0.041        |              | ***          | ***          | ***          | ***          | ***          | NS           | ***          | ***          | ***          | ***          | ***          | ***          | ***          | ***          | ***          | ***          | ***          | ***   | ***   | ***   | ***   | ***   | ***   | ***   | *** |
| 901 | 0.123        | 0.083        | 0.142        |              | ***          | ***          | *            | ***          | ***          | ***          | ***          | ***          | ***          | ***          | ***          | ***          | ***          | ***          | ***          | ***          | ***   | ***   | ***   | ***   | ***   | ***   | ***   | *** |
| DF2 | 0.271        | 0.272        | 0.224        | 0.368        |              | ***          | ***          | ***          | ***          | ***          | ***          | ***          | ***          | ***          | ***          | ***          | ***          | ***          | ***          | ***          | ***   | ***   | ***   | ***   | ***   | ***   | ***   | *** |
| DF3 | 0.356        | 0.367        | 0.364        | 0.418        | 0.426        |              | ***          | ***          | ***          | ***          | ***          | ***          | ***          | ***          | ***          | ***          | ***          | ***          | ***          | ***          | ***   | ***   | ***   | ***   | ***   | ***   | ***   | *** |
| RF  | 0.105        | 0.076        | 0.137        | 0.025        | 0.395        | 0.433        |              | ***          | ***          | ***          | ***          | ***          | ***          | ***          | ***          | ***          | ***          | ***          | ***          | ***          | ***   | ***   | ***   | ***   | ***   | ***   | ***   | *** |
| TJ  | 0.018        | 0.015        | 0.056        | 0.137        | 0.317        | 0.392        | 0.123        |              | ***          | ***          | *            | *            | ***          | ***          | ***          | ***          | ***          | ***          | ***          | ***          | ***   | ***   | ***   | ***   | ***   | ***   | ***   | *** |
| LJ  | 0.068        | 0.058        | 0.009        | 0.188        | 0.265        | 0.394        | 0.173        | 0.051        |              | ***          | ***          | ***          | ***          | ***          | ***          | ***          | ***          | ***          | ***          | ***          | ***   | ***   | ***   | ***   | ***   | ***   | ***   | *** |
| NJ  | 0.140        | 0.123        | <b>0.173</b> | 0.238        | 0.346        | 0.378        | 0.250        | 0.118        | 0.170        |              | ***          | ***          | ***          | ***          | ***          | ***          | ***          | ***          | ***          | ***          | ***   | ***   | ***   | ***   | ***   | ***   | ***   | *** |
| PL  | 0.043        | 0.024        | 0.063        | 0.135        | 0.293        | 0.368        | 0.131        | 0.023        | 0.059        | 0.098        |              | **           | ***          | ***          | ***          | ***          | ***          | ***          | ***          | ***          | ***   | ***   | ***   | ***   | ***   | ***   | ***   | *** |
| YZ  | 0.047        | 0.035        | 0.050        | 0.136        | 0.278        | 0.379        | 0.133        | 0.040        | 0.039        | 0.159        | 0.022        |              | ***          | ***          | ***          | ***          | ***          | ***          | ***          | ***          | ***   | ***   | ***   | ***   | ***   | ***   | ***   | *** |
| HG  | 0.070        | 0.112        | 0.181        | 0.261        | 0.367        | 0.378        | 0.218        | 0.138        | 0.189        | 0.224        | 0.149        | 0.159        |              | ***          | ***          | ***          | ***          | ***          | ***          | ***          | ***   | ***   | ***   | ***   | ***   | ***   | ***   | *** |
| LZ  | 0.019        | 0.037        | 0.059        | 0.174        | 0.283        | 0.376        | 0.140        | 0.052        | 0.060        | 0.170        | 0.062        | 0.062        | 0.064        |              | NS           | ***          | ***          | ***          | ***          | ***          | ***   | ***   | ***   | ***   | ***   | ***   | ***   | *** |
| GW  | 0.071        | 0.121        | 0.186        | 0.289        | 0.394        | 0.442        | 0.231        | 0.138        | 0.187        | 0.263        | 0.166        | 0.170        | 0.004        | <b>0.064</b> |              | **           | ***          | ***          | ***          | ***          | ***   | ***   | ***   | ***   | ***   | ***   | ***   | *** |
| PT  | 0.102        | 0.146        | 0.215        | 0.288        | 0.440        | 0.458        | 0.225        | 0.160        | 0.215        | 0.308        | 0.196        | 0.192        | 0.059        | 0.109        | 0.041        |              | ***          | ***          | ***          | ***          | ***   | ***   | ***   | ***   | ***   | ***   | ***   | *** |
| XP  | 0.157        | 0.173        | 0.229        | 0.330        | 0.399        | 0.486        | 0.295        | 0.170        | 0.188        | 0.252        | 0.156        | 0.148        | 0.173        | 0.131        | 0.177        | 0.230        |              | ***          | ***          | ***          | ***   | ***   | ***   | ***   | ***   | ***   | ***   | *** |
| XS  | 0.109        | 0.117        | 0.134        | 0.238        | 0.302        | 0.393        | 0.214        | 0.136        | 0.149        | 0.184        | 0.111        | 0.123        | 0.122        | 0.101        | 0.136        | 0.161        | 0.168        |              | ***          | ***          | ***   | ***   | ***   | ***   | ***   | ***   | ***   | *** |
| YM  | 0.106        | 0.138        | 0.175        | 0.249        | 0.357        | 0.436        | 0.231        | 0.174        | 0.205        | 0.239        | 0.161        | 0.175        | 0.152        | 0.113        | 0.169        | 0.210        | 0.276        | 0.088        |              | ***          | ***   | ***   | ***   | ***   | ***   | ***   | ***   | *** |
| ZD  | 0.075        | 0.100        | 0.138        | 0.227        | 0.315        | 0.407        | 0.206        | 0.117        | 0.153        | 0.196        | 0.117        | 0.124        | 0.093        | 0.069        | 0.096        | 0.138        | 0.149        | 0.037        | 0.069        |              | ***   | ***   | ***   | ***   | ***   | ***   | ***   | *** |
| EP  | <b>0.581</b> | <b>0.588</b> | <b>0.578</b> | <b>0.637</b> | <b>0.602</b> | <b>0.472</b> | <b>0.650</b> | <b>0.609</b> | <b>0.599</b> | <b>0.602</b> | <b>0.581</b> | <b>0.586</b> | <b>0.627</b> | <b>0.596</b> | <b>0.672</b> | <b>0.660</b> | <b>0.695</b> | <b>0.600</b> | <b>0.633</b> | <b>0.616</b> |       | ***   | ***   | ***   | ***   | ***   | ***   | *** |
| SH  | <b>0.459</b> | <b>0.470</b> | <b>0.463</b> | <b>0.517</b> | <b>0.470</b> | <b>0.340</b> | <b>0.535</b> | <b>0.497</b> | <b>0.487</b> | <b>0.485</b> | <b>0.466</b> | <b>0.462</b> | <b>0.504</b> | <b>0.485</b> | <b>0.547</b> | <b>0.551</b> | <b>0.582</b> | <b>0.478</b> | <b>0.514</b> | <b>0.502</b> | 0.256 |       | ***   | ***   | ***   | ***   | ***   | *** |
| AW  | <b>0.453</b> | <b>0.461</b> | <b>0.449</b> | <b>0.512</b> | <b>0.447</b> | <b>0.322</b> | <b>0.531</b> | <b>0.489</b> | <b>0.478</b> | <b>0.473</b> | <b>0.459</b> | <b>0.453</b> | <b>0.496</b> | <b>0.474</b> | <b>0.539</b> | <b>0.546</b> | <b>0.575</b> | <b>0.456</b> | <b>0.505</b> | <b>0.487</b> | 0.457 | 0.175 |       | ***   | ***   | ***   | ***   | *** |
| WA  | <b>0.439</b> | <b>0.447</b> | <b>0.444</b> | <b>0.503</b> | <b>0.453</b> | <b>0.361</b> | <b>0.522</b> | <b>0.470</b> | <b>0.464</b> | <b>0.456</b> | <b>0.439</b> | <b>0.449</b> | <b>0.494</b> | <b>0.460</b> | <b>0.534</b> | <b>0.543</b> | <b>0.561</b> | <b>0.457</b> | <b>0.502</b> | <b>0.480</b> | 0.459 | 0.335 | 0.319 |       | ***   | ***   | ***   | *** |
| SP  | <b>0.408</b> | <b>0.412</b> | <b>0.412</b> | <b>0.470</b> | <b>0.408</b> | <b>0.325</b> | <b>0.490</b> | <b>0.435</b> | <b>0.433</b> | <b>0.404</b> | <b>0.399</b> | <b>0.410</b> | <b>0.452</b> | <b>0.426</b> | <b>0.494</b> | <b>0.509</b> | <b>0.518</b> | <b>0.413</b> | <b>0.460</b> | <b>0.439</b> | 0.434 | 0.301 | 0.290 | 0.068 |       | ***   | ***   | *** |
| KA  | <b>0.340</b> | <b>0.345</b> | <b>0.344</b> | <b>0.394</b> | <b>0.368</b> | <b>0.240</b> | <b>0.409</b> | <b>0.379</b> | <b>0.377</b> | <b>0.360</b> | <b>0.340</b> | <b>0.356</b> | <b>0.375</b> | <b>0.357</b> | <b>0.425</b> | <b>0.439</b> | <b>0.465</b> | <b>0.353</b> | <b>0.398</b> | <b>0.380</b> | 0.386 | 0.230 | 0.248 | 0.210 | 0.199 |       | ***   | *** |
| HA  | <b>0.283</b> | <b>0.297</b> | <b>0.277</b> | <b>0.342</b> | <b>0.301</b> | <b>0.152</b> | <b>0.366</b> | <b>0.316</b> | <b>0.311</b> | <b>0.304</b> | <b>0.289</b> | <b>0.288</b> | <b>0.323</b> | <b>0.308</b> | <b>0.364</b> | <b>0.389</b> | <b>0.403</b> | <b>0.307</b> | <b>0.342</b> | <b>0.327</b> | 0.325 | 0.176 | 0.179 | 0.223 | 0.184 | 0.115 |       | *** |
| SA  | 0.294        | 0.306        | 0.297        | 0.351        | 0.310        | 0.158        | 0.376        | 0.330        | 0.332        | 0.307        | 0.303        | 0.307        | 0.328        | 0.325        | 0.375        | 0.399        | 0.419        | 0.322        | 0.362        | 0.344        | 0.329 | 0.189 | 0.190 | 0.238 | 0.184 | 0.120 | 0.029 |     |

\*  $P < 0.05$ ; \*\*  $P < 0.001$ ; \*\*\*  $P < 0.0001$ ; NS, not significant.

Table S6 The primer information of SSR markers (Li *et al.*, 2015)

| No | SSR   | Motif    | Forward primer (5'-3')   | Reverse primer (5'-3')    | Tm (°C) | size (bp) |
|----|-------|----------|--------------------------|---------------------------|---------|-----------|
| 1  | SJ3   | (CTG)10  | CTTATTCGTGCTGCGTTCATAC   | AGTTTGAGCCTCTGCGTCAT      | 55      | 321       |
|    | SJ13  | (GTCGG)7 | CAGCAGATGGCGACTTACTTTAG  | GTCTTGACGGAGCGTTTGAT      |         | 279       |
|    | SJ80  | (GCA)10  | CTCCGACTGCCATACTCTTTGAC  | CTTCGTGCTTACGTATATCCGAGTT |         | 321       |
| 2  | SJ20  | (TTGCT)7 | AGAGAACGCGGAGTGGAAC      | CGCACTCGTCACAACGTGTAT     | 58      | 299       |
|    | SJ66  | (CCATA)5 | GACTCCTCCGACTCGATCCT     | ATAAGTTCTCCCGAAGCTGTTTCT  |         | 296       |
|    | SJ95  | (TCGG)5  | CGGTTAGGCACTCCATTGTATC   | GCCAGTCGAAACTCAATACTCATAC |         | 327       |
| 3  | SJ133 | (CAG)8   | AGCGATAATCAGGAAATCGTCTC  | GTTTGGGTTGTTCTGTACATTC    | 58      | 319       |
|    | SJ106 | (TGT)7   | ACAAGAAGAGCGCACAGAGAAT   | ATACGTACGTGATAGCTGGACTTC  |         | 281       |
|    | SJ132 | (TAG)11  | GGTATACTTTCTCCGCCATCAAG  | GCACCGAGTTTCTACACCTGTT    |         | 329       |
| 4  | SJ52  | (AGGC)5  | ATGAAGGCAATCATCATCAGGT   | TAGCACCAACGCTCTAGAATAGAAG | 57      | 298       |
|    | SJ31  | (CAG)6   | AAGCAGCAGCCATCATGTTAC    | CTGGTCAAGTCTCTGCTCTCATC   |         | 267       |
|    | SJ93  | (AAAC)7  | CACCCTTATCATCCCTGTTCAAG  | TTCGGGACAAGAGTGATACATAGTT |         | 316       |
| 5  | SJ86  | (TTAT)6  | AGTAGAAGCGGCAGTAGGTAGGAC | AAGAGCAACACATACATGCATAC   | 57      | 313       |
|    | SJ102 | (TGC)6   | TACTGTACTGCAGTGCTTGCATTG | CAGCAGCACTACTCCTAGGTACATT |         | 274       |
|    | SJ99  | (ACAG)5  | AAAGGTTGGACAGACACGATATG  | ATCCCTTCTCTTTCTCGTTCTCT   |         | 321       |
| 6  | SJ110 | (GTA)7   | GGACGAAGTTATGGACTCGTTTC  | GTATCACCCGTAGTTTCCTCACC   | 57      | 291       |
|    | SJ101 | (CGTA)8  | ACAACGCTCCCAAGAGACTG     | GGTCGCATGGTAAGCTCTTCT     |         | 326       |
| 7  | SJ21  | (CCTTC)7 | TTTGTCGCTCTCGCTCTT       | GATGTCCTTGCCCTTCAAATAC    | 55      | 309       |
|    | SJ113 | (TGC)9   | GAACGAACGGACGAATCGTAT    | GTGGACCACAGGGAGAGAGAT     |         | 281       |
|    | SJ125 | (GAAG)7  | CCTCAGCTTCTCGATCCTCTT    | CTTTGGTTGTCGTTGTTGTTATCC  |         | 327       |
| 8  | SJ24  | (GAACC)7 | CACGTCTGCTTCTGCTCTACAAC  | CGTAGATGATGAACAGGCTGAAC   | 57      | 306       |
|    | SJ114 | (CAC)9   | AGCAGCAGAGCTGGAGACTG     | GTCGTGTCCGAGTAGGAGGTTAG   |         | 282       |
|    | SJ136 | (TGTCC)7 | GGGTATCTCTCGGAATGATAGAAC | AGAGCTAGCAGTAGCTGTGGAAAT  |         | 329       |

Reference:

Li, Q. Y., Zhang, J., Yao, J. T., Wang, X. L. & Duan, D. L. Development of *Saccharina japonica* genomic SSR markers using next-generation sequencing. *J. Appl. Phycol.* doi:10.1007/s10811-015-0643-0 (2015).
